# Supplementary material for: Longitudinal metabolic and gut bacterial profiling of pregnant women with previous bariatric surgery
Source: HighWire-hosted journal article supplement (doi:10.1136/gutjnl-2019-319620), 2020-01-21
Supplement: gutjnl-2019-319620supp001_data_supplement.pdf [file gutjnl-2019-319620supp001_data_supplement.pdf]

## SUPPLEMENTARY DATA

**Longitudinal metabolic and gut bacterial profiling of pregnant women with previous bariatric surgery**

| Contents                                                                                                                                           | Page |
|----------------------------------------------------------------------------------------------------------------------------------------------------|------|
| <b>Figure S1:</b> Summary of sampling by individual.....                                                                                           | 2    |
| <b>Table S1:</b> Samples analysed.....                                                                                                             | 2    |
| <b>Table S2:</b> Clinical characteristics and pregnancy outcomes of the study participants.....                                                    | 3    |
| <b>Table S3:</b> Summary of OPLS-DA model statistics.....                                                                                          | 4    |
| <b>Figure S2:</b> Overlaid median 1H NMR serum spectra.....                                                                                        | 5    |
| <b>Table S4:</b> Metabolite identification.....                                                                                                    | 6    |
| <b>Figure S3:</b> Maternal metabolic changes depend on type of bariatric surgery.....                                                              | 7    |
| <b>Table S5:</b> Maternal metabolic changes depend on type of bariatric surgery.....                                                               | 8    |
| <b>Figure S4:</b> Principal component analysis (PCA) of 1H NMR spectral data.....                                                                  | 10   |
| <b>Figure S5:</b> Overlaid median 1H NMR urine spectra.....                                                                                        | 11   |
| <b>Figure S6:</b> Chemical shifts of unknown metabolite.....                                                                                       | 11   |
| <b>Figure S7:</b> Relative concentrations of urinary host-microbial co-metabolites vary depending on bariatric surgery sub-type.....               | 12   |
| <b>Table S6:</b> Differentially abundant taxa in malabsorptive group.....                                                                          | 13   |
| <b>Table S7:</b> Differentially abundant amplicon sequence variants.....                                                                           | 15   |
| <b>Table S8:</b> Relative concentrations of metabolites correlate with maternal insulin resistance and fetal/birth weight.....                     | 16   |
| <b>Figure S8:</b> Key metabolites are not associated with percentage of weight lost or length of time since surgery in malabsorptive patients..... | 17   |

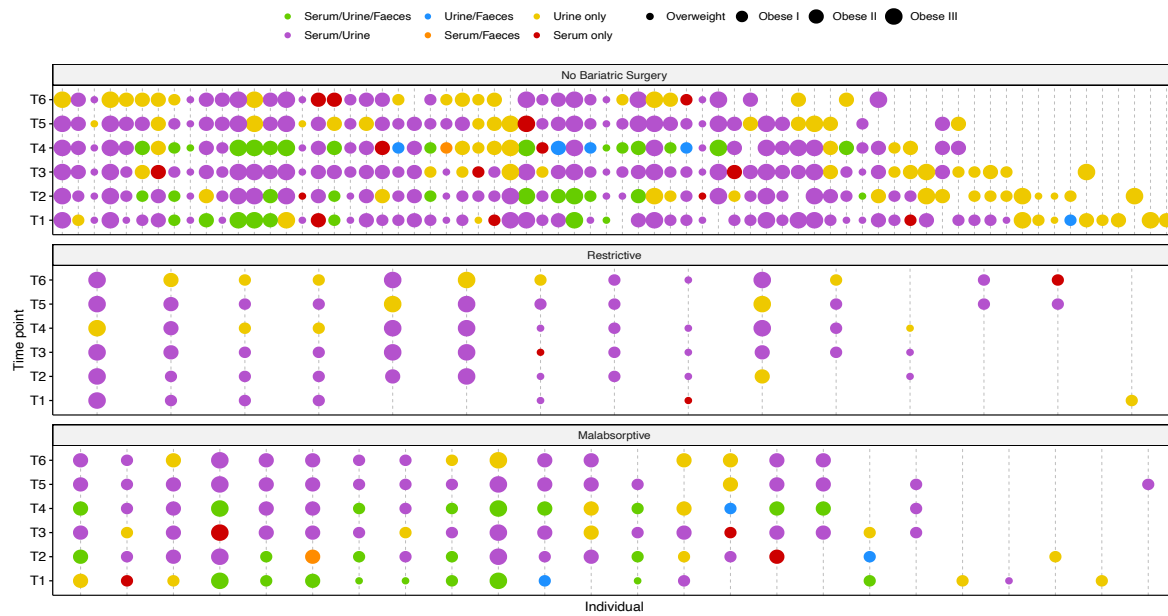

**Figure S1: Summary of sampling by individual.** Each point represents a sampling event for an individual and is coloured based on which samples were collected and analysed. The size of the point represents the BMI category of the individual at that time point. *T1 11-14 weeks gestation; T2 20-24 weeks gestation; T3 28-30 weeks gestation; T4 30-33 weeks gestation; T5 35-37 weeks gestation; T6 delivery*

**Table S1: Samples analysed.** Number of samples analysed for each biospecimen type at each time point.

|        | Group | Maternal |    |    |    |    |    | Total | Infant<br>T6 |
|--------|-------|----------|----|----|----|----|----|-------|--------------|
|        |       | T1       | T2 | T3 | T4 | T5 | T6 |       |              |
| Serum  | NBS   | 54       | 47 | 47 | 43 | 38 | 27 | 256   | 30           |
|        | RES   | 6        | 10 | 12 | 8  | 10 | 7  | 53    | 10           |
|        | MAL   | 12       | 15 | 15 | 15 | 17 | 11 | 85    | 14           |
| Urine  | NBS   | 63       | 61 | 58 | 52 | 51 | 41 | 326   | 18           |
|        | RES   | 6        | 11 | 11 | 12 | 12 | 12 | 64    | 6            |
|        | MAL   | 16       | 16 | 17 | 18 | 18 | 16 | 101   | 4            |
| Faeces | NBS   | 9        | 11 | -  | 21 | -  | -  | 41    | -            |
|        | MAL   | 10       | 7  | -  | 10 | -  | -  | 27    | -            |

*NBS no bariatric surgery; RES restrictive; MAL malabsorptive; T1 11-14 weeks gestation; T2 20-24 weeks gestation; T3 28-30 weeks gestation; T4 30-33 weeks gestation; T5 35-37 weeks gestation; T6 delivery*

**Table S2: Clinical characteristics and pregnancy outcomes of the study participants**

| Variable                                    | No bariatric surgery<br>(n = 70) | Post-bariatric surgery<br>(n = 41) | Restrictive<br>(n = 16) | Malabsorptive<br>(n = 25) |
|---------------------------------------------|----------------------------------|------------------------------------|-------------------------|---------------------------|
| Maternal age, years                         | 29.72 ± 5.26                     | 33.46 ± 4.58*                      | 32.56 ± 4.32*           | 34.04 ± 4.8*              |
| Parity, n (%)                               |                                  |                                    |                         |                           |
| Nulliparous                                 | 43 (61.4)                        | 20 (48.8)                          | 9 (56.3)                | 11 (44.0)                 |
| Parous                                      | 27 (38.6)                        | 21 (51.2)                          | 7 (43.8)                | 14 (56.0)                 |
| Racial group, n (%)                         |                                  |                                    |                         |                           |
| White                                       | 54 (77.1)                        | 31 (75.6)                          | 12 (75)                 | 19 (76.0)                 |
| Other                                       | 16 (22.9)                        | 10 (24.4)                          | 4 (25)                  | 6 (24.0)                  |
| Conception, n (%)                           |                                  |                                    |                         |                           |
| Spontaneous                                 | 67 (95.7)                        | 38 (92.7)                          | 16 (100.0)              | 22 (88.0)                 |
| Assisted reproductive techniques            | 3 (4.3)                          | 3 (7.3)                            | 0 (0)                   | 3 (12.0)                  |
| Smoking, n (%)                              |                                  |                                    |                         |                           |
| No                                          | 67 (95.7)                        | 36 (87.8)                          | 15 (93.8)               | 21 (84.0)                 |
| Yes                                         | 3 (4.3)                          | 5 (12.2)                           | 1 (6.3)                 | 4 (16.0)                  |
| Time between surgery and conception, months | -                                | 58.34 ± 31.24                      | 49.12 ± 30.54           | 64.24 ± 30.83†            |
| BMI prior to surgery, kg/m <sup>2</sup>     | -                                | 47.19 ± 7.95                       | 41.95 ± 6.47            | 50.54 ± 7.01†             |
| Booking BMI, kg/m <sup>2</sup>              | 34.12 ± 5.68                     | 32.94 ± 5.10                       | 32.96 ± 7.29            | 32.93 ± 4.10              |
| Gestational age at delivery, weeks          | 39.44 ± 1.34                     | 38.67 ± 2.266*                     | 38.95 ± 2.31            | 38.49 ± 2.26*             |
| Mode of delivery, n (%)                     |                                  |                                    |                         |                           |
| Vaginal                                     | 38 (54.3)                        | 21 (51.2)                          | 6 (37.5)                | 15 (60.0)                 |
| Caesarean section                           | 32 (45.7)                        | 20 (48.8)                          | 10 (62.5)               | 10 (40.0)                 |
| Birth weight, g                             | 3520.92 ± 603.86                 | 3062.53 ± 588.32*                  | 3096.75 ± 519.07*       | 3040.64 ± 638.12*         |
| Birth weight percentile                     | 59.48 ± 33.30                    | 39.01 ± 27.35*                     | 39.29 ± 26.25*          | 38.83 ± 28.57*            |

Data are expressed as mean ± standard deviation or as otherwise stated. \*P < 0.05 comparison to no bariatric surgery group; †P < 0.05 comparison between restrictive and malabsorptive groups

**Table S3: Summary of OPLS-DA model statistics.** OPLS-DA model statistics for two-group comparisons are reported for each time point after excluding extreme outliers identified from PCA models.

| Time point       | Biofluid      | Samples    | Outliers Excluded | Class                    | R <sup>2</sup> X | R <sup>2</sup> Y | Q <sup>2</sup> | P value         |  |
|------------------|---------------|------------|-------------------|--------------------------|------------------|------------------|----------------|-----------------|--|
| 11-14 weeks (T1) | Urine         | NBS n = 63 | NBS n = 3         | NBS vs RES               | 0.119            | 0.776            | -0.117         | NS              |  |
|                  |               | RES n = 6  | RES n = 1         | RES vs MAL               | 0.171            | 0.935            | -0.025         | NS              |  |
|                  |               | MAL n = 16 | MAL n = 2         | <b>NBS vs MAL</b>        | <b>0.088</b>     | <b>0.830</b>     | <b>0.159</b>   | <b>0.015388</b> |  |
|                  | Serum         | NBS n = 54 | NBS n = 0         | NBS vs RES               | 0.022            | 0.817            | -0.274         | NS              |  |
|                  |               | RES n = 6  | RES n = 0         | RES vs MAL               | 0.058            | 0.929            | -0.044         | NS              |  |
|                  |               | MAL n = 12 | MAL n = 0         | NBS vs MAL               | 0.037            | 0.749            | -0.156         | NS              |  |
| 20-24 weeks (T2) | Urine         | NBS n = 61 | NBS n = 1         | NBS vs RES               | 0.096            | 0.810            | 0.094          | NS              |  |
|                  |               | RES n = 11 | RES n = 1         | RES vs MAL               | 0.140            | 0.941            | 0.297          | NS              |  |
|                  |               | MAL n = 16 | MAL n = 0         | <b>NBS vs MAL</b>        | <b>0.095</b>     | <b>0.843</b>     | <b>0.324</b>   | <b>1.17E-05</b> |  |
|                  | Serum         | NBS n = 47 | NBS n = 0         | NBS vs RES               | 0.027            | 0.830            | -0.067         | NS              |  |
|                  |               | RES n = 10 | RES n = 0         | RES vs MAL               | 0.051            | 0.900            | 0.056          | NS              |  |
|                  |               | MAL n = 15 | MAL n = 0         | NBS vs MAL               | 0.031            | 0.825            | 0.114          | NS              |  |
| 28-30 weeks (T3) | Urine         | NBS n = 58 | NBS n = 0         | NBS vs RES               | 0.111            | 0.826            | 0.046          | NS              |  |
|                  |               | RES n = 11 | RES n = 1         | RES vs MAL               | 0.187            | 0.893            | 0.343          | NS              |  |
|                  |               | MAL n = 17 | MAL n = 3         | <b>NBS vs MAL</b>        | <b>0.100</b>     | <b>0.843</b>     | <b>0.407</b>   | <b>3.71E-07</b> |  |
|                  | Serum         | NBS n = 47 | NBS n = 0         | NBS vs RES               | 0.033            | 0.748            | -0.218         | NS              |  |
|                  |               | RES n = 12 | RES n = 0         | RES vs MAL               | 0.049            | 0.948            | 0.216          | NS              |  |
|                  |               | MAL n = 15 | MAL n = 0         | NBS vs MAL               | 0.040            | 0.744            | 0.091          | NS              |  |
| 30-33 weeks (T4) | Urine         | NBS n = 52 | NBS n = 2         | NBS vs RES               | 0.121            | 0.790            | 0.052          | NS              |  |
|                  |               | RES n = 12 | RES n = 1         | RES vs MAL               | 0.131            | 0.921            | 0.086          | NS              |  |
|                  |               | MAL n = 18 | MAL n = 1         | <b>NBS vs MAL</b>        | <b>0.119</b>     | <b>0.812</b>     | <b>0.344</b>   | <b>2.42E-05</b> |  |
|                  | Serum         | NBS n = 43 | NBS n = 0         | NBS vs RES               | 0.034            | 0.742            | -0.098         | NS              |  |
|                  |               | RES n = 8  | RES n = 0         | RES vs MAL               | 0.075            | 0.881            | 0.214          | NS              |  |
|                  |               | MAL n = 15 | MAL n = 0         | <b>NBS vs MAL</b>        | <b>0.042</b>     | <b>0.775</b>     | <b>0.178</b>   | <b>0.027</b>    |  |
| 35-37 weeks (T5) | Urine         | NBS n = 51 | NBS n = 2         | NBS vs RES               | 0.117            | 0.802            | 0.023          | NS              |  |
|                  |               | RES n = 12 | RES n = 0         | RES vs MAL               | 0.135            | 0.935            | 0.001          | NS              |  |
|                  |               | MAL n = 18 | MAL n = 0         | <b>NBS vs MAL</b>        | <b>0.109</b>     | <b>0.852</b>     | <b>0.483</b>   | <b>2.11E-08</b> |  |
|                  | Serum         | NBS n = 38 | NBS n = 0         | NBS vs RES               | 0.026            | 0.908            | -0.377         | NS              |  |
|                  |               | RES n = 10 | RES n = 0         | RES vs MAL               | 0.054            | 0.916            | 0.224          | NS              |  |
|                  |               | MAL n = 17 | MAL n = 0         | <b>NBS vs MAL</b>        | <b>0.048</b>     | <b>0.847</b>     | <b>0.245</b>   | <b>0.006</b>    |  |
| Delivery (T6)    | Urine         | NBS n = 41 | NBS n = 2         | NBS vs RES               | 0.087            | 0.844            | 0.055          | NS              |  |
|                  |               | RES n = 12 | RES n = 0         | RES vs MAL               | 0.164            | 0.907            | 0.110          | NS              |  |
|                  |               | MAL n = 16 | MAL n = 4         | NBS vs MAL               | 0.134            | 0.767            | 0.067          | NS              |  |
|                  | Serum         | NBS n = 27 | NBS n = 0         | NBS vs RES               | 0.035            | 0.895            | -0.116         | NS              |  |
|                  |               | RES n = 7  | RES n = 0         | RES vs MAL               | 0.068            | 0.903            | -0.103         | NS              |  |
|                  |               | MAL n = 11 | MAL n = 0         | NBS vs MAL               | 0.055            | 0.789            | 0.028          | NS              |  |
|                  | Cord Blood    | NBS n = 30 | NBS n = 0         | NBS vs RES               | 0.030            | 0.886            | -0.022         | NS              |  |
|                  |               | RES n = 10 | RES n = 0         | RES vs MAL               | 0.043            | 0.925            | -0.025         | NS              |  |
|                  |               | MAL n = 14 | MAL n = 0         | NBS vs MAL               | 0.037            | 0.885            | 0.031          | NS              |  |
|                  | Newborn urine | NBS n = 18 | NBS n = 0         | Univariate analysis only |                  |                  |                |                 |  |
|                  |               | RES n = 6  | RES n = 0         |                          |                  |                  |                |                 |  |
|                  |               | MAL n = 4  | MAL n = 0         |                          |                  |                  |                |                 |  |

NBS no bariatric surgery; RES restrictive; MAL malabsorptive; NS not significant ( $P < 0.05$ )

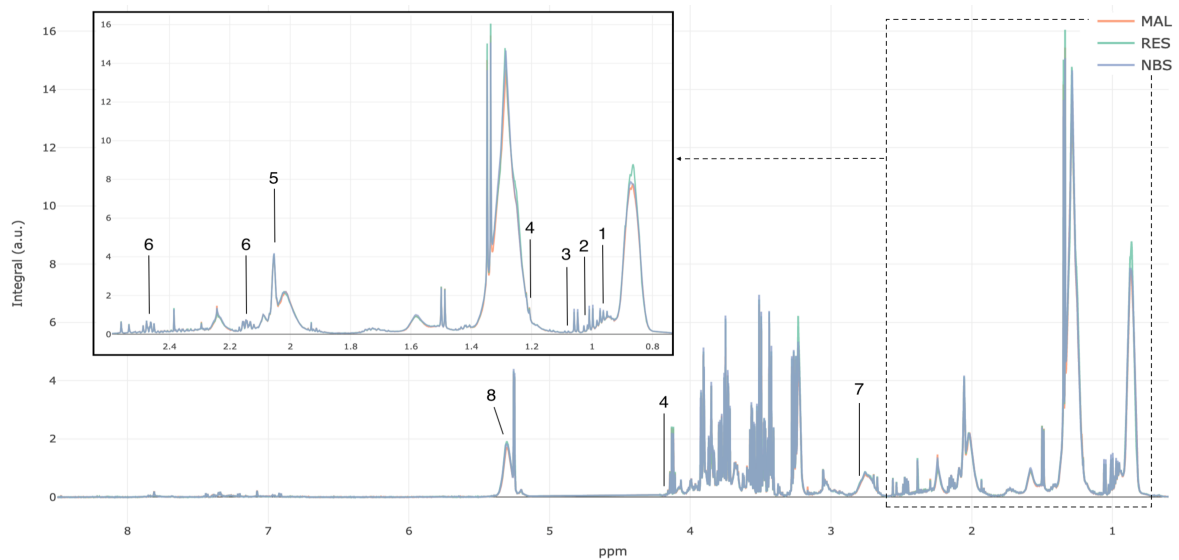

**Figure S2: Overlaid median  $^1\text{H}$  NMR serum spectra.** A median spectrum is plotted for each study group. Annotated peaks and peak groups are those that were considered discriminatory in OPLS-DA models comparing malabsorptive (MAL) and no bariatric surgery (NBS) patients. The representative spectrum for restrictive (RES) patients is also plotted. 1 leucine; 2 isoleucine; 3 isobutyrate; 4 D- $\beta$ -hydroxybutyrate; 5 N-acetyl glycoprotein (GlycA); 6 glutamine; 7 lipids ( $\text{C}=\text{CCH}_2\text{C}=\text{C}$ ); 8 unsaturated lipids ( $\text{CH}=\text{CH}$ )

**Table S4: Metabolite identification**

| Metabolite             | <sup>1</sup> H NMR Chemical Shifts*                                     | Confirmed by                           | Biofluid |
|------------------------|-------------------------------------------------------------------------|----------------------------------------|----------|
| Leucine                | 0.96 (2xd), 1.71 (m), 3.73 (t)                                          | STOCSY/STORM, J-res                    | Serum    |
| Isoleucine             | 0.94 (t), 1.01 (d)                                                      | STOCSY/STORM, J-res                    | Serum    |
| Isobutyrate            | 1.09 (d)                                                                | STOCSY/STORM, J-res, HSQC              | Serum    |
| N-acetyl glycoprotein  | 2.05 (s)                                                                | STOCSY/STORM, J-res, HSQC              | Serum    |
| Glutamine              | 2.14 (m), 2.46 (m), 3.77 (t)                                            | STOCSY/STORM, J-res, HSQC              | Serum    |
| D-β-hydroxybutyrate    | 1.22 (d), 2.37 (m), 4.17 (m)                                            | STOCSY/STORM, J-res                    | Serum    |
| Valine                 | 0.99 (d), 1.04 (d)                                                      | STOCSY/STORM, J-res                    | Urine    |
| α-ketoisovalerate      | 1.11 (d)                                                                | STOCSY/STORM, J-res                    | Urine    |
| Methylmalonate         | 1.24 (d)                                                                | STOCSY/STORM, J-res                    | Urine    |
| Creatinine             | 3.05 (s), 4.06 (s)                                                      | STOCSY/STORM, J-res                    | Urine    |
| p-cresol sulfate       | 2.35 (s), 7.21 (d), 7.28 (d)                                            | STOCSY/STORM, J-res, HSQC              | Urine    |
| p-hydroxyphenylacetate | 3.45 (s), 6.86 (d), 7.17 (d)                                            | STOCSY/STORM, J-res, HSQC,<br>spike in | Urine    |
| Phenylacetylglutamine  | 1.92 (m), 2.11 (m), 2.27 (m), 3.67 (m),<br>4.19 (m), 7.36 (t), 7.43 (t) | STOCSY/STORM, J-res, HSQC              | Urine    |
| Unknown                | 7.34 (d), 7.48 (t)                                                      | STOCSY/STORM, J-res, HSQC              | Urine    |
| Indoxyl sulfate        | 7.5 (d), 7.7 (d)                                                        | STOCSY/STORM, J-res, HSQC,<br>spike in | Urine    |

\*s=singlet, d=doublet, t=triplet, m=multiplet

STOCSY: Statistical Total Correlation Spectroscopy; STORM: Subset Optimisation by Reference Matching; HSQC: Hetero-nuclear Single Quantum Coherence (2D NMR)

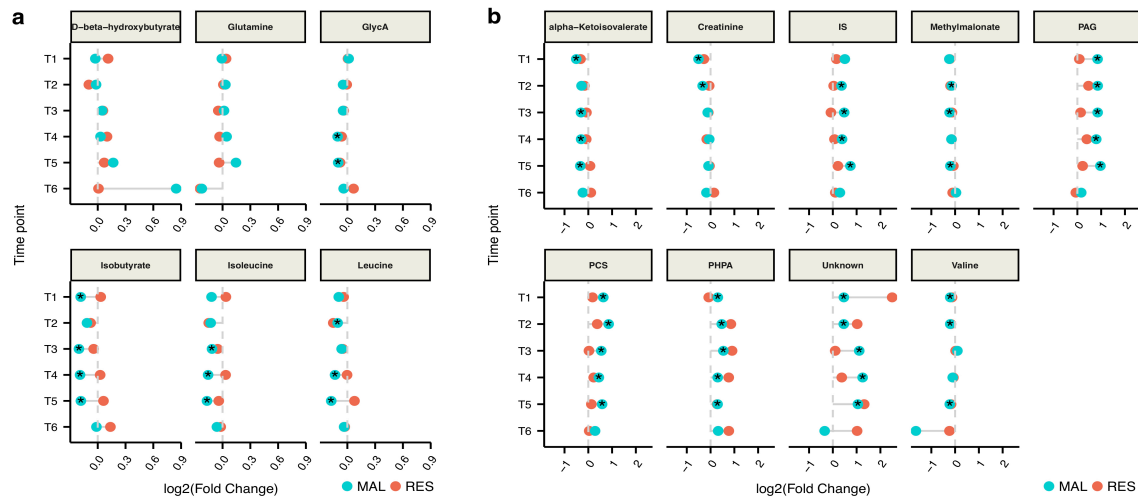

**Figure S3: Maternal metabolic changes depend on type of bariatric surgery.** For each discriminatory metabolite identified in (a) serum or (b) urine samples, changes in relative concentrations for malabsorptive (MAL) and restrictive (RES) groups are plotted at each time point. The no bariatric surgery (NBS) group was used as the reference group in fold change calculations. *T1 11-14 weeks gestation; T2 20-24 weeks gestation; T3 28-30 weeks gestation; T4 30-33 weeks gestation; T5 35-37 weeks gestation; T6 delivery; GlycA N-acetyl glycoprotein; IS indoxyl sulfate; PAG phenylacetylglutamine; PCS p-cresol sulfate; PHPA p-hydroxyphenylacetate; \* $P_{adj} < 0.05$  (Mann-Whitney U)*

**Table S5: Maternal metabolic changes depend on type of bariatric surgery.** For each discriminatory metabolite identified by OPLS-DA (malabsorptive versus no bariatric surgery), changes in relative concentrations are detailed at each time point with no bariatric surgery as the reference group. Calculations in the restrictive group are shown for comparison.

| Metabolite          | Biofluid | Time point | Restrictive         |          |                  | Malabsorptive       |          |                  |
|---------------------|----------|------------|---------------------|----------|------------------|---------------------|----------|------------------|
|                     |          |            | log <sub>2</sub> FC | P        | P <sub>adj</sub> | log <sub>2</sub> FC | P        | P <sub>adj</sub> |
| Isoleucine          | Serum    | T1         | 0.036               | NS       | NS               | -0.119              | NS       | NS               |
|                     |          | T2         | -0.149              | 3.15E-02 | NS               | -0.128              | 3.54E-02 | NS               |
|                     |          | T3         | -0.053              | NS       | NS               | -0.114              | 2.14E-02 | 4.18E-02         |
|                     |          | T4         | 0.033               | NS       | NS               | -0.156              | 1.11E-02 | 2.56E-02         |
|                     |          | T5         | -0.041              | NS       | NS               | -0.168              | 4.62E-03 | 1.49E-02         |
|                     |          | T6         | -0.02               | NS       | NS               | -0.061              | NS       | NS               |
| Leucine             | Serum    | T1         | -0.04               | NS       | NS               | -0.093              | NS       | NS               |
|                     |          | T2         | -0.152              | 7.02E-03 | NS               | -0.105              | 2.65E-02 | 4.97E-02         |
|                     |          | T3         | -0.049              | NS       | NS               | -0.062              | NS       | NS               |
|                     |          | T4         | -0.003              | NS       | NS               | -0.133              | 2.39E-03 | 8.97E-03         |
|                     |          | T5         | 0.077               | NS       | NS               | -0.174              | 1.26E-04 | 1.14E-03         |
|                     |          | T6         | -0.028              | NS       | NS               | -0.035              | NS       | NS               |
| Isobutyrate         | Serum    | T1         | 0.032               | NS       | NS               | -0.184              | 1.45E-03 | 5.69E-03         |
|                     |          | T2         | -0.077              | NS       | NS               | -0.116              | NS       | NS               |
|                     |          | T3         | -0.044              | NS       | NS               | -0.203              | 3.61E-04 | 1.86E-03         |
|                     |          | T4         | 0.026               | NS       | NS               | -0.191              | 2.54E-04 | 1.76E-03         |
|                     |          | T5         | 0.062               | NS       | NS               | -0.182              | 3.70E-04 | 1.86E-03         |
|                     |          | T6         | 0.137               | NS       | NS               | -0.014              | NS       | NS               |
| Glutamine           | Serum    | T1         | 0.038               | NS       | NS               | -0.008              | NS       | NS               |
|                     |          | T2         | 0.009               | NS       | NS               | 0.031               | NS       | NS               |
|                     |          | T3         | -0.046              | NS       | NS               | 0.016               | NS       | NS               |
|                     |          | T4         | -0.032              | NS       | NS               | 0.044               | NS       | NS               |
|                     |          | T5         | -0.037              | NS       | NS               | 0.145               | 4.81E-02 | NS               |
|                     |          | T6         | -0.242              | NS       | NS               | -0.224              | NS       | NS               |
| D-β-hydroxybutyrate | Serum    | T1         | 0.112               | NS       | NS               | -0.026              | NS       | NS               |
|                     |          | T2         | -0.096              | NS       | NS               | -0.018              | NS       | NS               |
|                     |          | T3         | 0.056               | NS       | NS               | 0.047               | NS       | NS               |
|                     |          | T4         | 0.1                 | NS       | NS               | 0.03                | NS       | NS               |
|                     |          | T5         | 0.07                | NS       | NS               | 0.167               | NS       | NS               |
|                     |          | T6         | 0.008               | NS       | NS               | 0.847               | NS       | NS               |
| GlycA               | Serum    | T1         | 0.007               | NS       | NS               | 0.014               | NS       | NS               |
|                     |          | T2         | -0.007              | NS       | NS               | -0.046              | NS       | NS               |
|                     |          | T3         | -0.039              | NS       | NS               | -0.046              | NS       | NS               |
|                     |          | T4         | -0.062              | NS       | NS               | -0.105              | 1.57E-02 | 3.37E-02         |
|                     |          | T5         | -0.079              | NS       | NS               | -0.099              | 2.02E-02 | 4.04E-02         |
|                     |          | T6         | 0.067               | NS       | NS               | -0.04               | NS       | NS               |
| PAG                 | Urine    | T1         | 0.082               | NS       | NS               | 0.85                | 1.02E-04 | 1.02E-03         |
|                     |          | T2         | 0.469               | NS       | NS               | 0.854               | 2.99E-05 | 4.38E-04         |
|                     |          | T3         | 0.137               | NS       | NS               | 0.853               | 4.73E-05 | 5.32E-04         |
|                     |          | T4         | 0.397               | NS       | NS               | 0.794               | 3.39E-05 | 4.38E-04         |
|                     |          | T5         | 0.222               | NS       | NS               | 0.97                | 1.27E-06 | 1.14E-04         |
|                     |          | T6         | -0.064              | NS       | NS               | 0.162               | NS       | NS               |
|                     |          | T1         | 0.178               | NS       | NS               | 0.631               | 1.42E-03 | 5.69E-03         |
|                     |          | T2         | 0.375               | NS       | NS               | 0.856               | 2.40E-04 | 1.76E-03         |



|                           |       |    |        |          |    |        |          |          |
|---------------------------|-------|----|--------|----------|----|--------|----------|----------|
| PCS                       | Urine | T3 | 0.028  | NS       | NS | 0.547  | 1.49E-02 | 3.26E-02 |
|                           |       | T4 | 0.228  | NS       | NS | 0.444  | 1.01E-02 | 2.39E-02 |
|                           |       | T5 | 0.13   | NS       | NS | 0.581  | 3.69E-03 | 1.28E-02 |
|                           |       | T6 | 0.04   | NS       | NS | 0.286  | NS       | NS       |
| IS                        | Urine | T1 | 0.151  | NS       | NS | 0.505  | 4.10E-02 | NS       |
|                           |       | T2 | 0.035  | NS       | NS | 0.365  | 8.85E-03 | 2.28E-02 |
|                           |       | T3 | -0.081 | NS       | NS | 0.478  | 8.02E-03 | 2.12E-02 |
|                           |       | T4 | 0.069  | NS       | NS | 0.388  | 6.51E-03 | 1.77E-02 |
|                           |       | T5 | 0.212  | NS       | NS | 0.739  | 1.83E-05 | 4.38E-04 |
|                           |       | T6 | 0.105  | NS       | NS | 0.297  | NS       | NS       |
| PHPA                      | Urine | T1 | -0.077 | NS       | NS | 0.305  | 7.77E-04 | 3.50E-03 |
|                           |       | T2 | 0.854  | 4.51E-02 | NS | 0.47   | 1.34E-03 | 5.69E-03 |
|                           |       | T3 | 0.905  | 2.53E-02 | NS | 0.539  | 3.41E-05 | 4.38E-04 |
|                           |       | T4 | 0.764  | 4.42E-03 | NS | 0.3    | 9.69E-03 | 2.39E-02 |
|                           |       | T5 | 0.279  | 3.34E-02 | NS | 0.296  | 4.98E-03 | 1.55E-02 |
|                           |       | T6 | 0.767  | NS       | NS | 0.321  | 4.20E-02 | NS       |
| Unknown                   | Urine | T1 | 2.495  | 8.54E-03 | NS | 0.463  | 3.60E-04 | 1.86E-03 |
|                           |       | T2 | 1.025  | 4.19E-02 | NS | 0.459  | 6.08E-03 | 1.73E-02 |
|                           |       | T3 | 0.1    | NS       | NS | 1.111  | 6.15E-03 | 1.73E-02 |
|                           |       | T4 | 0.375  | 3.36E-02 | NS | 1.252  | 2.68E-05 | 4.38E-04 |
|                           |       | T5 | 1.319  | 1.89E-03 | NS | 1.055  | 3.71E-04 | 1.86E-03 |
|                           |       | T6 | 1.021  | 4.69E-02 | NS | -0.343 | NS       | NS       |
| Creatinine                | Urine | T1 | -0.282 | NS       | NS | -0.505 | 3.10E-05 | 4.38E-04 |
|                           |       | T2 | -0.057 | NS       | NS | -0.333 | 2.53E-03 | 9.12E-03 |
|                           |       | T3 | -0.096 | NS       | NS | -0.119 | NS       | NS       |
|                           |       | T4 | -0.159 | NS       | NS | -0.055 | NS       | NS       |
|                           |       | T5 | -0.045 | NS       | NS | -0.086 | NS       | NS       |
|                           |       | T6 | 0.141  | NS       | NS | -0.173 | NS       | NS       |
| $\alpha$ -ketoisovalerate | Urine | T1 | -0.327 | NS       | NS | -0.504 | 2.24E-04 | 1.76E-03 |
|                           |       | T2 | -0.161 | NS       | NS | -0.284 | NS       | NS       |
|                           |       | T3 | -0.078 | NS       | NS | -0.307 | 1.77E-02 | 3.63E-02 |
|                           |       | T4 | -0.087 | NS       | NS | -0.301 | 2.27E-02 | 4.36E-02 |
|                           |       | T5 | 0.073  | NS       | NS | -0.335 | 1.77E-02 | 3.63E-02 |
|                           |       | T6 | 0.106  | NS       | NS | -0.23  | NS       | NS       |
| Methylmalonate            | Urine | T1 | -0.224 | NS       | NS | -0.242 | 3.87E-02 | NS       |
|                           |       | T2 | -0.191 | NS       | NS | -0.143 | 1.27E-02 | 2.86E-02 |
|                           |       | T3 | -0.133 | NS       | NS | -0.23  | 3.83E-03 | 1.28E-02 |
|                           |       | T4 | -0.148 | NS       | NS | -0.153 | NS       | NS       |
|                           |       | T5 | -0.073 | NS       | NS | -0.198 | 1.00E-02 | 2.39E-02 |
|                           |       | T6 | -0.102 | NS       | NS | 0.038  | NS       | NS       |
| Valine                    | Urine | T1 | -0.13  | NS       | NS | -0.204 | 5.31E-03 | 1.59E-02 |
|                           |       | T2 | -0.175 | 8.95E-03 | NS | -0.204 | 3.72E-04 | 1.86E-03 |
|                           |       | T3 | 0.021  | 2.32E-02 | NS | 0.097  | NS       | NS       |
|                           |       | T4 | -0.071 | NS       | NS | -0.1   | 3.67E-02 | NS       |
|                           |       | T5 | -0.169 | 9.34E-03 | NS | -0.224 | 4.80E-04 | 2.28E-03 |
|                           |       | T6 | -0.237 | NS       | NS | -1.649 | NS       | NS       |

*GlycA* N-acetyl glycoprotein; *PAG* phenylacetylglutamine; *PCS* p-cresol sulfate; *IS* indoxyl sulfate; *PHPA* p-hydroxyphenylacetate; T1 11-14 weeks gestation; T2 20-24 weeks gestation; T3 28-30 weeks gestation; T4 30-33 weeks gestation; T5 35-37 weeks gestation; T6 delivery; FC fold change; NS not significant ( $P < 0.05$ )

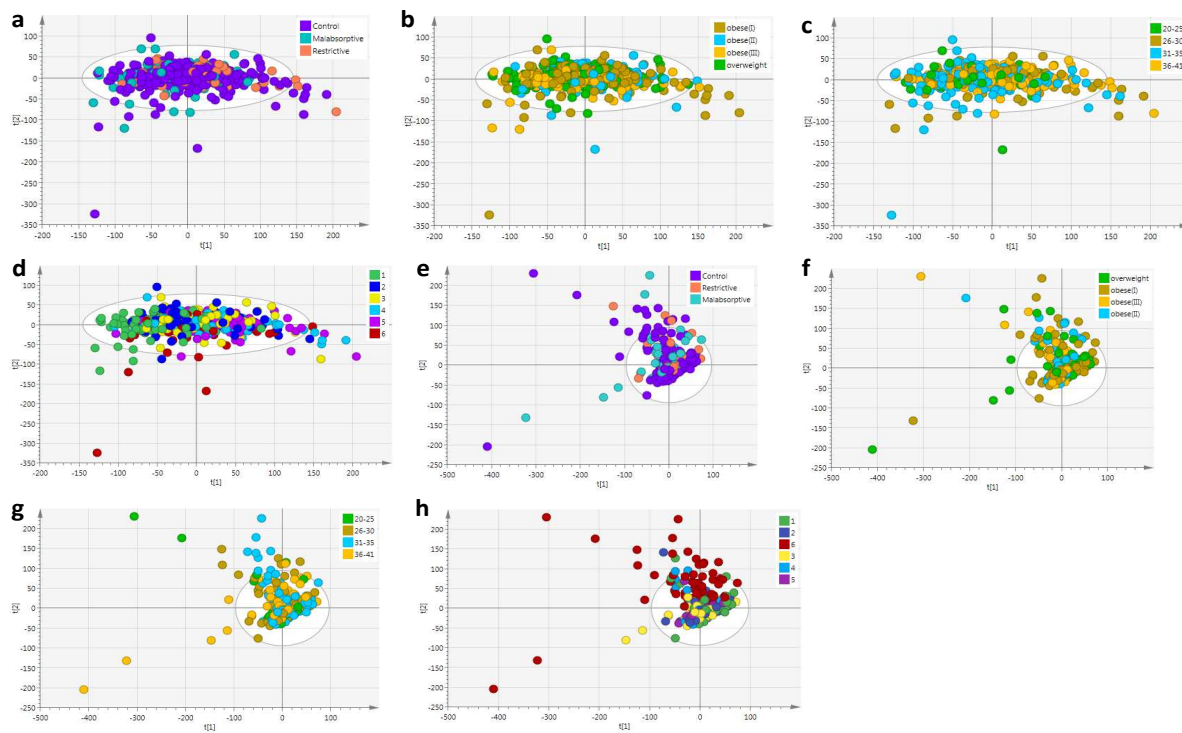

**Figure S4: Principal component analysis (PCA) of <sup>1</sup>H NMR spectral data.** Unsupervised PCA models were calculated with all samples analysed to assess overall variation in metabolic profiles. Serum metabolic profiles did not vary according to a) study group, b) BMI, or c) age but variation due to d) time point was observed between first trimester (T1) samples and those taken during later pregnancy (T2-T5) or at delivery (T6). Urinary metabolic profiles did not display overt signatures according to e) study group, f) BMI, or g) age but variation but due to h) time point was evident between samples taken during pregnancy (T1-T5) and those taken at delivery (T6). *T1 11-14 weeks gestation; T2 20-24 weeks gestation; T3 28-30 weeks gestation; T4 30-33 weeks gestation; T5 35-37 weeks gestation; T6 delivery*

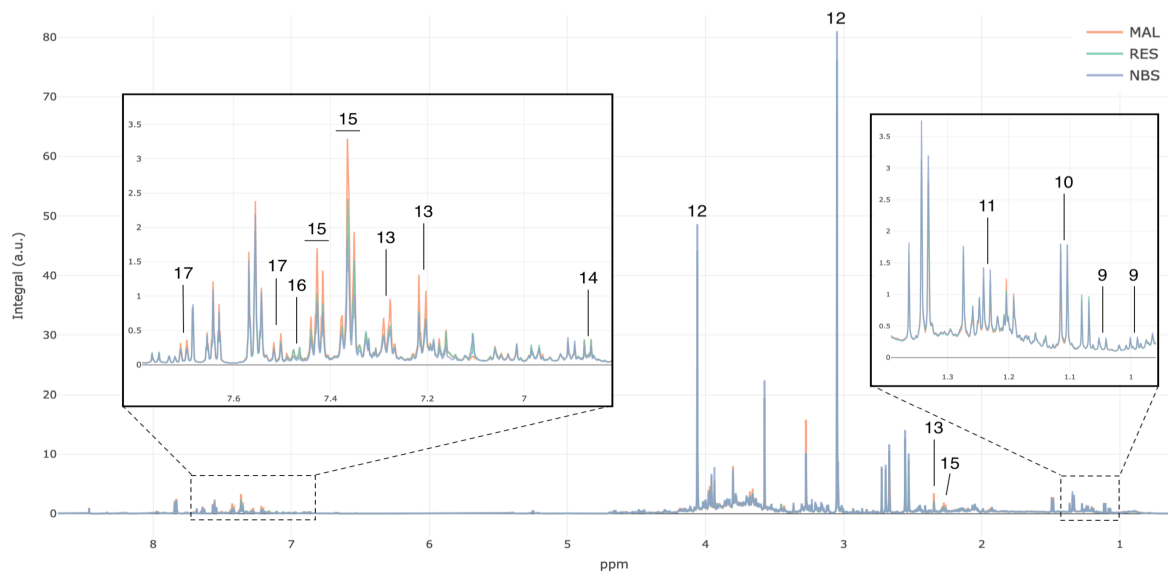

**Figure S5: Overlaid median  $^1\text{H}$  NMR urine spectra.** A median spectrum is plotted for each study group with annotated peaks and peak groups. Annotated metabolites were considered discriminatory in OPLS-DA models comparing malabsorptive (MAL) and no bariatric surgery (NBS) patients. The representative spectrum for restrictive (RES) patients is also plotted. 9 valine; 10  $\alpha$ -ketoisovalerate; 11 methylmalonate; 12 creatinine; 13 *p*-cresol sulfate; 14 *p*-hydroxyphenylacetate; 15 phenylacetylglutamine; 16 unknown; 17 indoxyl sulfate

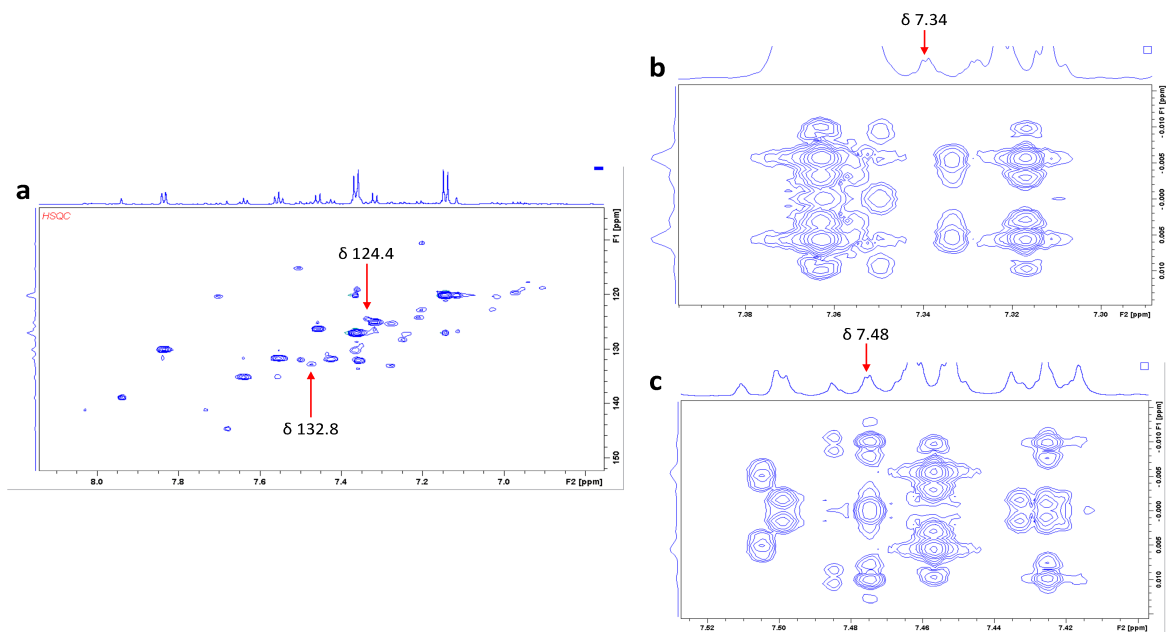

**Figure S6: Chemical shifts of unknown metabolite.** a) Hetero-nuclear Single Quantum Coherence (HSQC) spectrum detailing  $^{13}\text{C}$  chemical shifts and b-c) J-resolved spectra detailing the proton-proton coupling of the  $^1\text{H}$  chemical shifts.

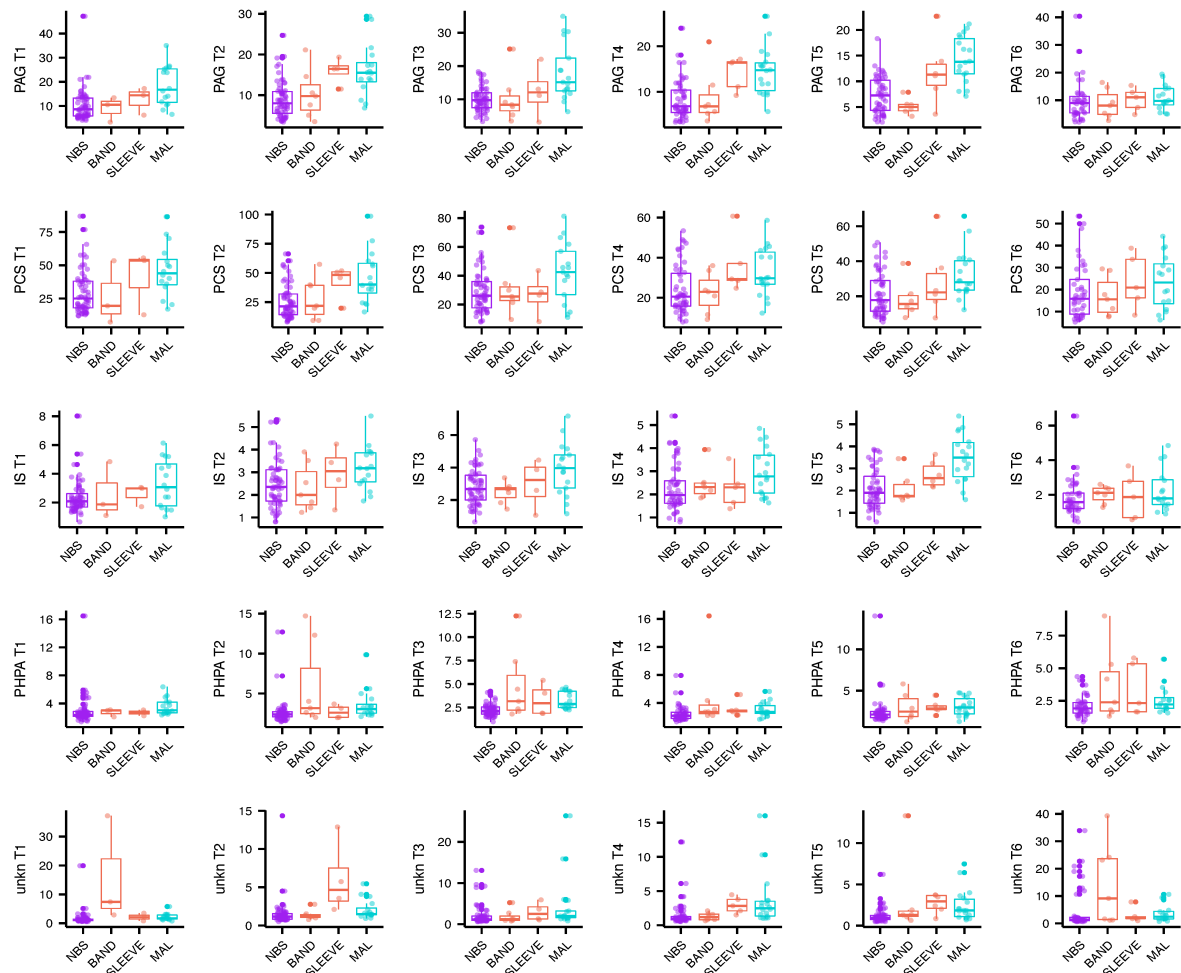

**Figure S7: Relative concentrations of urinary host-microbial co-metabolites vary depending on bariatric surgery sub-type.** Relative concentrations of each metabolite (by row) at each time point (by column) are represented in arbitrary units. Restrictive patients are separated by surgery sub-type (band or sleeve). *NBS* no bariatric surgery; *MAL* malabsorptive; *PAG* phenylacetylglutamine; *PCS* p-cresol sulfate; *IS* indoxyl sulfate; *PHPA* p-hydroxyphenylacetate; *unkn* unknown; *T1* 11-14 weeks gestation; *T2* 20-24 weeks gestation; *T3* 28-30 weeks gestation; *T4* 30-33 weeks gestation; *T5* 35-37 weeks gestation; *T6* delivery

**Table S6: Differentially abundant taxa in malabsorptive group.** For each taxonomic rank, differential abundance was assessed by calculating  $\log_2(\text{FC})$  of taxa relative abundances at each time point and applying the Mann-Whitney U test. Taxa with  $P_{adj} < 0.05$  are reported.

| Rank   | Time point | Taxon                       | Mean relative abundance malabsorptive | Mean relative abundance control | P value  | $\log_2(\text{FC})$ | $P_{adj}$ |
|--------|------------|-----------------------------|---------------------------------------|---------------------------------|----------|---------------------|-----------|
| Phylum | T1         | <i>Proteobacteria</i>       | 0.13632                               | 0.02701                         | 0.0017   | 2.34                | 0.0237    |
| Phylum | T4         | <i>Bacteroidetes</i>        | 0.39265                               | 0.52280                         | 0.0016   | -0.41               | 0.0237    |
| Phylum | T4         | <i>Proteobacteria</i>       | 0.16318                               | 0.03249                         | 5.45E-05 | 2.33                | 0.0020    |
| Class  | T1         | <i>Gammaproteobacteria</i>  | 0.12379                               | 0.01714                         | 0.0022   | 2.85                | 0.0248    |
| Class  | T1         | <i>Clostridia</i>           | 0.28025                               | 0.40068                         | 0.0048   | -0.52               | 0.0357    |
| Class  | T1         | <i>Bacilli</i>              | 0.05978                               | 0.00789                         | 0.0007   | 2.92                | 0.0144    |
| Class  | T2         | <i>Bacilli</i>              | 0.03774                               | 0.00694                         | 0.0011   | 2.44                | 0.0202    |
| Class  | T4         | <i>Bacteroidia</i>          | 0.39459                               | 0.52538                         | 0.0019   | -0.41               | 0.0248    |
| Class  | T4         | <i>Gammaproteobacteria</i>  | 0.13910                               | 0.01069                         | 2.61E-05 | 3.70                | 0.0020    |
| Class  | T4         | <i>Bacilli</i>              | 0.07171                               | 0.00987                         | 5.45E-05 | 2.86                | 0.0020    |
| Order  | T1         | <i>Enterobacteriales</i>    | 0.12097                               | 0.01627                         | 0.0048   | 2.89                | 0.0357    |
| Order  | T1         | <i>Clostridiales</i>        | 0.28024                               | 0.40059                         | 0.0048   | -0.52               | 0.0357    |
| Order  | T1         | <i>Lactobacillales</i>      | 0.05906                               | 0.00789                         | 0.0007   | 2.90                | 0.0144    |
| Order  | T2         | <i>Enterobacteriales</i>    | 0.11434                               | 0.02743                         | 0.0066   | 2.06                | 0.0425    |
| Order  | T2         | <i>Lactobacillales</i>      | 0.03772                               | 0.00689                         | 0.0011   | 2.45                | 0.0202    |
| Order  | T4         | <i>Bacteroidales</i>        | 0.39470                               | 0.52539                         | 0.0019   | -0.41               | 0.0248    |
| Order  | T4         | <i>Enterobacteriales</i>    | 0.12698                               | 0.00888                         | 4.54E-05 | 3.84                | 0.0020    |
| Order  | T4         | <i>Lactobacillales</i>      | 0.07137                               | 0.00982                         | 5.45E-05 | 2.86                | 0.0020    |
| Order  | T4         | <i>Pasteurellales</i>       | 0.01194                               | 0.00181                         | 0.0043   | 2.72                | 0.0357    |
| Order  | T4         | <i>Actinomycetales</i>      | 0.00084                               | 0.00025                         | 0.0043   | 1.76                | 0.0357    |
| Family | T1         | <i>Enterobacteriaceae</i>   | 0.12514                               | 0.01639                         | 0.0048   | 2.93                | 0.0357    |
| Family | T1         | <i>Streptococcaceae</i>     | 0.05582                               | 0.00795                         | 0.0029   | 2.81                | 0.0285    |
| Family | T1         | <i>Micrococcaceae</i>       | 0.00028                               | 8.76E-05                        | 0.0042   | 1.66                | 0.0357    |
| Family | T2         | <i>Enterobacteriaceae</i>   | 0.11799                               | 0.02810                         | 0.0066   | 2.07                | 0.0425    |
| Family | T2         | <i>Enterococcaceae</i>      | 0.00290                               | 1.30E-05                        | 0.0003   | 7.80                | 0.0086    |
| Family | T2         | <i>Streptococcaceae</i>     | 0.03420                               | 0.00689                         | 0.0021   | 2.31                | 0.0248    |
| Family | T2         | <i>Micrococcaceae</i>       | 0.00027                               | 4.95E-05                        | 0.0028   | 2.45                | 0.0285    |
| Family | T4         | <i>Enterobacteriaceae</i>   | 0.12905                               | 0.00927                         | 4.54E-05 | 3.80                | 0.0020    |
| Family | T4         | <i>Enterococcaceae</i>      | 0.00179                               | 2.78E-05                        | 0.0003   | 6.01                | 0.0086    |
| Family | T4         | <i>Streptococcaceae</i>     | 0.07027                               | 0.00983                         | 5.45E-05 | 2.84                | 0.0020    |
| Family | T4         | <i>Pasteurellaceae</i>      | 0.01203                               | 0.00183                         | 0.0043   | 2.72                | 0.0357    |
| Family | T4         | <i>Carnobacteriaceae</i>    | 0.00032                               | 6.41E-05                        | 0.0013   | 2.30                | 0.0222    |
| Family | T4         | <i>Micrococcaceae</i>       | 0.00023                               | 8.65E-05                        | 0.0079   | 1.40                | 0.0497    |
| Genus  | T1         | <i>Escherichia.Shigella</i> | 0.11566                               | 0.01274                         | 0.0022   | 3.18                | 0.0248    |

|       |    |                             |         |          |          |       |        |
|-------|----|-----------------------------|---------|----------|----------|-------|--------|
| Genus | T1 | <i>Streptococcus</i>        | 0.06395 | 0.00895  | 0.0022   | 2.84  | 0.0248 |
| Genus | T1 | <i>Anaerostipes</i>         | 0.00281 | 0.01592  | 0.0037   | -2.50 | 0.0350 |
| Genus | T1 | <i>Holdemanella</i>         | 0.02151 | 0.00238  | 0.0066   | 3.18  | 0.0425 |
| Genus | T1 | <i>Rothia</i>               | 0.00031 | 9.97E-05 | 0.0055   | 1.64  | 0.0380 |
| Genus | T2 | <i>Enterococcus</i>         | 0.00323 | 1.45E-05 | 0.0003   | 7.80  | 0.0086 |
| Genus | T2 | <i>Streptococcus</i>        | 0.03881 | 0.00794  | 0.0028   | 2.29  | 0.0285 |
| Genus | T2 | <i>Butyricimonas</i>        | 0.00191 | 0.00029  | 0.0050   | 2.70  | 0.0357 |
| Genus | T2 | <i>Rothia</i>               | 0.00030 | 5.59E-05 | 0.0028   | 2.43  | 0.0285 |
| Genus | T4 | <i>Escherichia.Shigella</i> | 0.12798 | 0.00838  | 5.44E-05 | 3.93  | 0.0020 |
| Genus | T4 | <i>Enterococcus</i>         | 0.00202 | 3.12E-05 | 0.0003   | 6.02  | 0.0086 |
| Genus | T4 | <i>Streptococcus</i>        | 0.07909 | 0.01096  | 5.45E-05 | 2.85  | 0.0020 |
| Genus | T4 | <i>Anaerostipes</i>         | 0.00395 | 0.01148  | 0.0064   | -1.54 | 0.0425 |
| Genus | T4 | <i>Haemophilus</i>          | 0.01321 | 0.00202  | 0.0049   | 2.71  | 0.0357 |
| Genus | T4 | <i>Veillonella</i>          | 0.00982 | 0.00120  | 0.0004   | 3.04  | 0.0097 |
| Genus | T4 | <i>Acidaminococcus</i>      | 0.00350 | 7.71E-05 | 0.0044   | 5.50  | 0.0357 |
| Genus | T4 | <i>Solobacterium</i>        | 0.00118 | 0.00029  | 0.0014   | 2.01  | 0.0223 |
| Genus | T4 | <i>Granulicatella</i>       | 0.00035 | 7.13E-05 | 0.0015   | 2.31  | 0.0233 |

FC fold change; T1 11-14 weeks gestation; T2 20-24 weeks gestation; T4 30-33 weeks gestation

**Table S7: Differentially abundant amplicon sequence variants.** 16S rRNA gene amplicon sequences belonging to genera of interest that are significantly ( $P_{adj} < 0.05$ ) more abundant (DESeq2) in the malabsorptive group compared to no bariatric surgery controls.

| Genus                                  | $\log_2(\text{FC})$ | $P_{adj}$ | Species assignment              |                             |
|----------------------------------------|---------------------|-----------|---------------------------------|-----------------------------|
|                                        |                     |           | RDP                             | SILVA                       |
| <i>Escherichia/</i><br><i>Shigella</i> | 4.96                | 0.0132    | <i>coli</i>                     | <i>coli/flexneri</i>        |
|                                        | 9.31                | 0.0005    | -                               | <i>coli</i>                 |
|                                        | 7.15                | 2.40E-05  | <i>coli</i>                     | <i>coli/fergusonii</i>      |
|                                        | 3.95                | 0.0412    | <i>coli/dysenteriae</i>         | -                           |
|                                        | 5.71                | 0.0357    | -                               | <i>coli</i>                 |
|                                        | 7.3                 | 1.20E-05  | <i>coli</i>                     | <i>coli</i>                 |
|                                        | 5.21                | 0.0293    | <i>coli/flexneri</i>            | <i>coli/flexneri/sonnei</i> |
|                                        | 3.3                 | 0.0184    | -                               | -                           |
|                                        | 22.69               | 6.80E-12  | <i>coli</i>                     | <i>coli</i>                 |
|                                        | 6.27                | 3.60E-06  | <i>coli</i>                     | <i>coli/fergusonii</i>      |
| 3.31                                   | 0.0002              | -         | -                               |                             |
| <i>Streptococcus</i>                   | 5.26                | 0.0408    | <i>gordonii</i>                 | <i>gordonii/sanguinis</i>   |
|                                        | 7.52                | 1.10E-13  | <i>vestibularis</i>             | <i>vestibularis</i>         |
|                                        | 3.68                | 6.70E-07  | <i>salivarius/ vestibularis</i> | -                           |
|                                        | 4.09                | 0.0076    | <i>salivarius/ vestibularis</i> | <i>salivarius</i>           |
|                                        | 5.4                 | 0.0376    | <i>salivarius</i>               | <i>salivarius</i>           |
|                                        | 4.24                | 1.40E-05  | -                               | <i>infantis</i>             |
|                                        | 3.45                | 0.0313    | <i>mitis/sanguinis</i>          | -                           |
|                                        | 4.05                | 0.0001    | <i>mutans</i>                   | <i>mutans</i>               |
|                                        | 3.61                | 0.0297    | <i>parasanguinis</i>            | <i>parasanguinis</i>        |
|                                        | 3.39                | 0.0201    | <i>mitis/parasanguinis</i>      | <i>mitis</i>                |
|                                        | 2.78                | 0.0135    | <i>parasanguinis</i>            | <i>parasanguinis</i>        |
|                                        | 3.34                | 0.0049    | -                               | <i>parasanguinis</i>        |
| <i>Enterococcus</i>                    | 6.98                | 1.00E-12  | <i>faecalis/faecium</i>         | <i>faecalis</i>             |
| <i>Rothia</i>                          | 2.01                | 0.0316    | <i>mucilaginoso</i>             | -                           |

FC fold change

**Table S8: Relative concentrations of metabolites correlate with maternal insulin resistance and fetal/birth weight.** Spearman's ( $\rho$ ) correlations between metabolite relative concentrations at each time point and clinical or biochemical measures. Statistically significant ( $P_{adj} < 0.05$ ) correlations are detailed along with partial correlations.

| Variable 1 | Variable 2                           | $\rho$ | $P$     | $P_{adj}$ | Partial $\rho$ | $P$     | $P_{adj}$ |
|------------|--------------------------------------|--------|---------|-----------|----------------|---------|-----------|
| PAG_T1     | Fasting Maternal Insulin (microU/ml) | -0.37  | 0.00063 | 0.00751   | -0.28          | 0.01335 | 0.02114   |
| PCS_T1     | Fasting Maternal Insulin (microU/ml) | -0.36  | 0.00111 | 0.00974   | -0.28          | 0.01229 | 0.02031   |
| IS_T1      | Fasting Maternal Insulin (microU/ml) | -0.31  | 0.00447 | 0.02349   | -0.30          | 0.00753 | 0.01607   |
| PAG_T2     | Fasting Maternal Insulin (microU/ml) | -0.46  | 0.00001 | 0.00040   | -0.32          | 0.00327 | 0.00879   |
| PCS_T2     | Fasting Maternal Insulin (microU/ml) | -0.35  | 0.00076 | 0.00796   | -0.23          | 0.03351 | 0.03979   |
| Ile_T2     | Fasting Maternal Insulin (microU/ml) | 0.4    | 0.00052 | 0.00727   | 0.38           | 0.00119 | 0.00664   |
| Leu_T2     | Fasting Maternal Insulin (microU/ml) | 0.38   | 0.00116 | 0.00974   | 0.37           | 0.00184 | 0.00865   |
| PAG_T3     | Fasting Maternal Insulin (microU/ml) | -0.46  | 0.00001 | 0.00044   | -0.33          | 0.00269 | 0.00865   |
| PCS_T3     | Fasting Maternal Insulin (microU/ml) | -0.42  | 0.00006 | 0.00155   | -0.33          | 0.00252 | 0.00865   |
| PAG_T4     | Fasting Maternal Insulin (microU/ml) | -0.4   | 0.00021 | 0.00348   | -0.36          | 0.00101 | 0.00664   |
| PCS_T4     | Fasting Maternal Insulin (microU/ml) | -0.4   | 0.00018 | 0.00328   | -0.39          | 0.00041 | 0.00466   |
| PAG_T5     | Fasting Maternal Insulin (microU/ml) | -0.48  | 0.00001 | 0.00040   | -0.39          | 0.00049 | 0.00466   |
| PCS_T5     | Fasting Maternal Insulin (microU/ml) | -0.41  | 0.00023 | 0.00353   | -0.30          | 0.00858 | 0.01717   |
| IS_T5      | Fasting Maternal Insulin (microU/ml) | -0.41  | 0.00017 | 0.00328   | -0.36          | 0.00122 | 0.00664   |
| Leu_T5     | Fasting Maternal Insulin (microU/ml) | 0.36   | 0.00444 | 0.02349   | 0.34           | 0.00761 | 0.01607   |
| PCS_T6     | Fasting Maternal Insulin (microU/ml) | -0.32  | 0.00719 | 0.03551   | -0.22          | NS      | NS        |
| PAG_T1     | Maternal HOMA-IR                     | -0.35  | 0.00148 | 0.01068   | -0.25          | 0.02701 | 0.03311   |
| PCS_T1     | Maternal HOMA-IR                     | -0.35  | 0.00161 | 0.01079   | -0.27          | 0.01638 | 0.02305   |
| IS_T1      | Maternal HOMA-IR                     | -0.29  | 0.00822 | 0.03943   | -0.27          | 0.01488 | 0.02262   |
| PAG_T2     | Maternal HOMA-IR                     | -0.46  | 0.00001 | 0.00040   | -0.32          | 0.00347 | 0.00879   |
| PCS_T2     | Maternal HOMA-IR                     | -0.33  | 0.00153 | 0.01068   | -0.20          | NS      | NS        |
| Ile_T2     | Maternal HOMA-IR                     | 0.38   | 0.00089 | 0.00828   | 0.35           | 0.00261 | 0.00865   |
| Leu_T2     | Maternal HOMA-IR                     | 0.33   | 0.00418 | 0.02341   | 0.31           | 0.00994 | 0.01808   |
| PAG_T3     | Maternal HOMA-IR                     | -0.41  | 0.00010 | 0.00235   | -0.26          | 0.01813 | 0.02461   |
| PCS_T3     | Maternal HOMA-IR                     | -0.35  | 0.00081 | 0.00796   | -0.23          | 0.03463 | 0.03988   |



|        |                  |       |         |         |       |          |            |
|--------|------------------|-------|---------|---------|-------|----------|------------|
| Ile_T3 | Maternal HOMA-IR | 0.3   | 0.00991 | 0.04500 | 0.20  | NS       | NS         |
| PAG_T4 | Maternal HOMA-IR | -0.37 | 0.00068 | 0.00766 | -0.32 | 0.00340  | 0.00879    |
| PCS_T4 | Maternal HOMA-IR | -0.35 | 0.00148 | 0.01068 | -0.31 | 0.00470  | 0.01115    |
| PAG_T5 | Maternal HOMA-IR | -0.44 | 0.00005 | 0.00155 | -0.34 | 0.00273  | 0.00865    |
| PCS_T5 | Maternal HOMA-IR | -0.33 | 0.00298 | 0.01857 | -0.21 | NS       | NS         |
| IS_T5  | Maternal HOMA-IR | -0.36 | 0.00138 | 0.01068 | -0.29 | 0.01047  | 0.01808    |
| Leu_T5 | Maternal HOMA-IR | 0.32  | 0.01084 | 0.04794 | 0.29  | 0.02488  | 0.03260    |
| PAG_T2 | EFW T2           | -0.31 | 0.00321 | 0.01925 | -0.26 | 0.01582  | 0.02305    |
| PCS_T2 | EFW T2           | -0.29 | 0.00657 | 0.03344 | -0.28 | 0.01014  | 0.01808    |
| Ile_T2 | EFW T2           | 0.3   | 0.00949 | 0.04428 | 0.20  | NS       | NS         |
| IS_T5  | EFW T5           | -0.32 | 0.00402 | 0.02328 | -0.26 | 0.02681  | 0.03311    |
| PAG_T6 | Birth weight     | -0.36 | 0.00270 | 0.01743 | -0.46 | 0.00020  | 0.00371    |
| IS_T6  | Birth weight     | -0.4  | 0.00059 | 0.00751 | -0.49 | 5.22E-05 | 0.00198351 |

PAG phenylacetylglutamine; PCS *p*-cresol sulfate; IS indoxyl sulfate; Ile isoleucine; Leu leucine; HOMA-IR Homeostatic Model Assessment of Insulin Resistance; EFW estimated fetal weight; T1 11-14 weeks gestation; T2 20-24 weeks gestation; T3 28-30 weeks gestation; T4 30-33 weeks gestation; T5 35-37 weeks gestation; T6 delivery

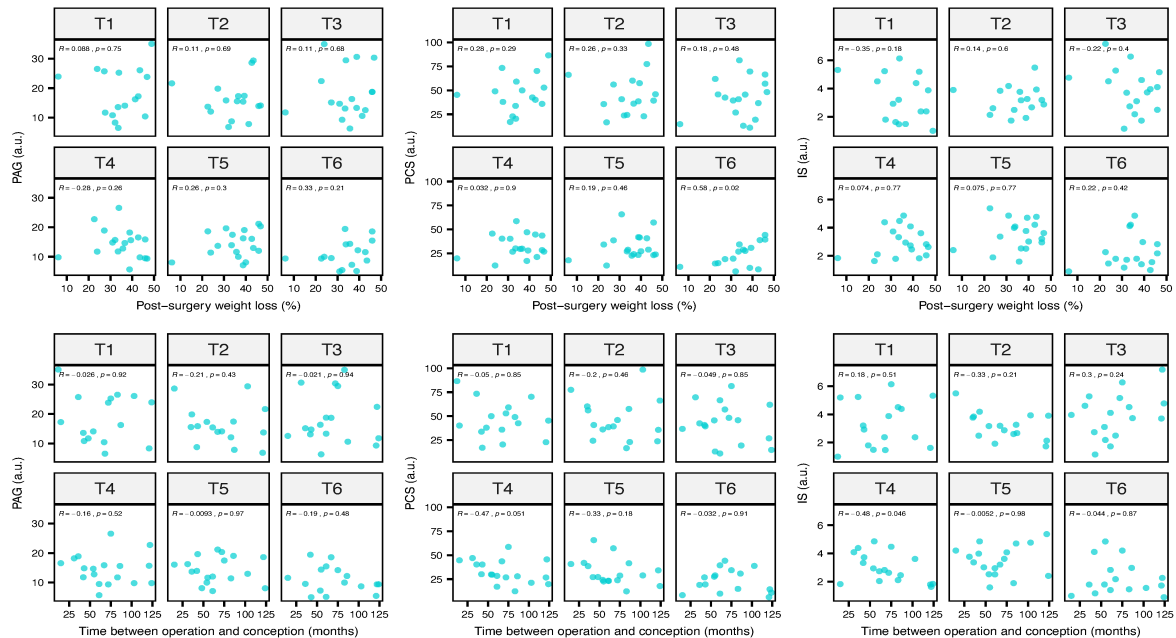

**Figure S8: Key metabolites are not associated with percentage of weight lost or length of time since surgery in malabsorptive patients.** Spearman correlations between metabolite relative concentrations at each time point and (a) percentage of weight lost from time of surgery to conception or (b) number of months between time of surgery and conception. Relative concentrations are reported in arbitrary units (a.u.). PAG phenylacetylglutamine; PCS *p*-cresol sulfate; IS indoxyl sulfate.
